# Supplementary material for: DeepSynth: Three-dimensional nuclear segmentation of biological images using neural networks trained with synthetic data
Source: PubMed Central journal article supplement (PMC6892824; doi:10.1038/s41598-019-54244-5), 2019-12-04
Supplement: 41598_2019_54244_MOESM1_ESM.pdf [file 41598_2019_54244_MOESM1_ESM.pdf]

**Supplementary Information:**

**Supplementary Figures  
Legends to Supplementary Videos**

**DeepSynth: Three-dimensional nuclear segmentation of biological images using  
neural networks trained with synthetic data**

Kenneth W. Dunn<sup>1\*</sup>, Chichen Fu<sup>2</sup>, David Joon Ho<sup>2</sup>, Soonam Lee<sup>2</sup>, Shuo Han<sup>2</sup>, Paul Salama<sup>3</sup>  
and Edward J. Delp<sup>2\*</sup>.

## Supplementary Figure 1 and 2

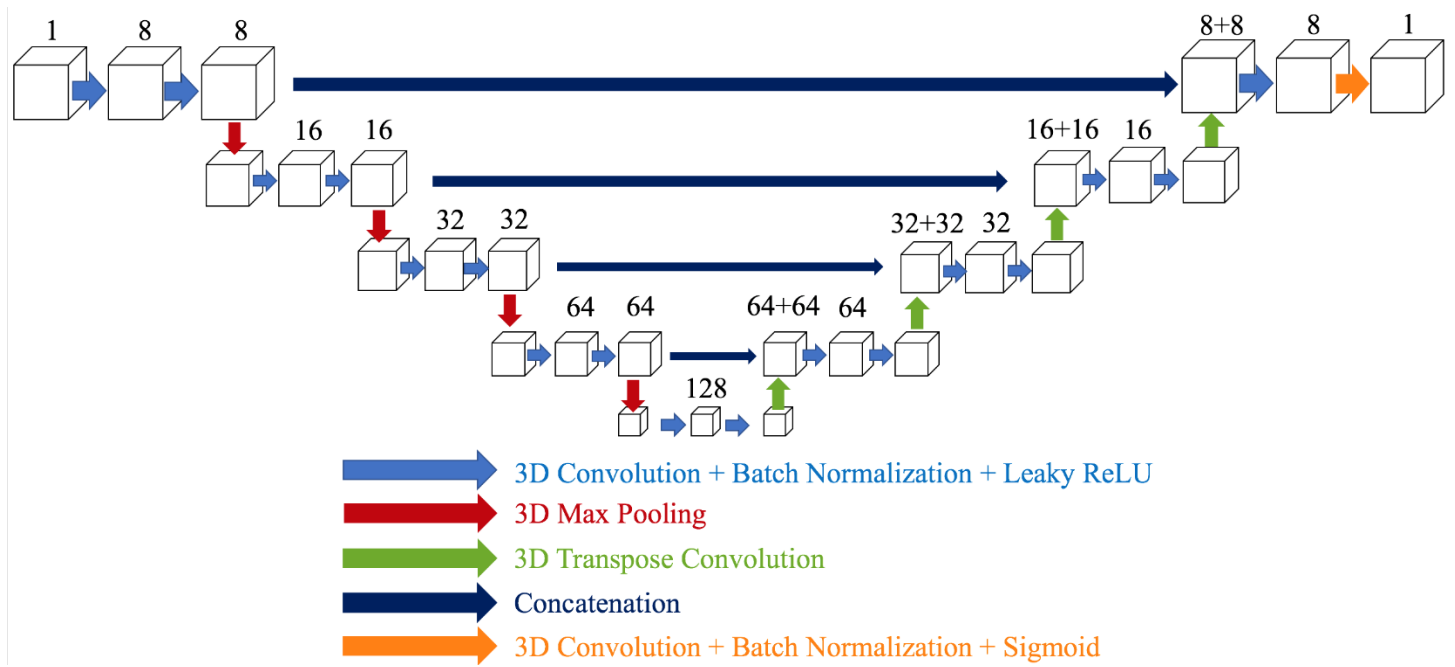

Supplementary Figure 1 – Architecture of the segmentation network of the DeepSynth CNN

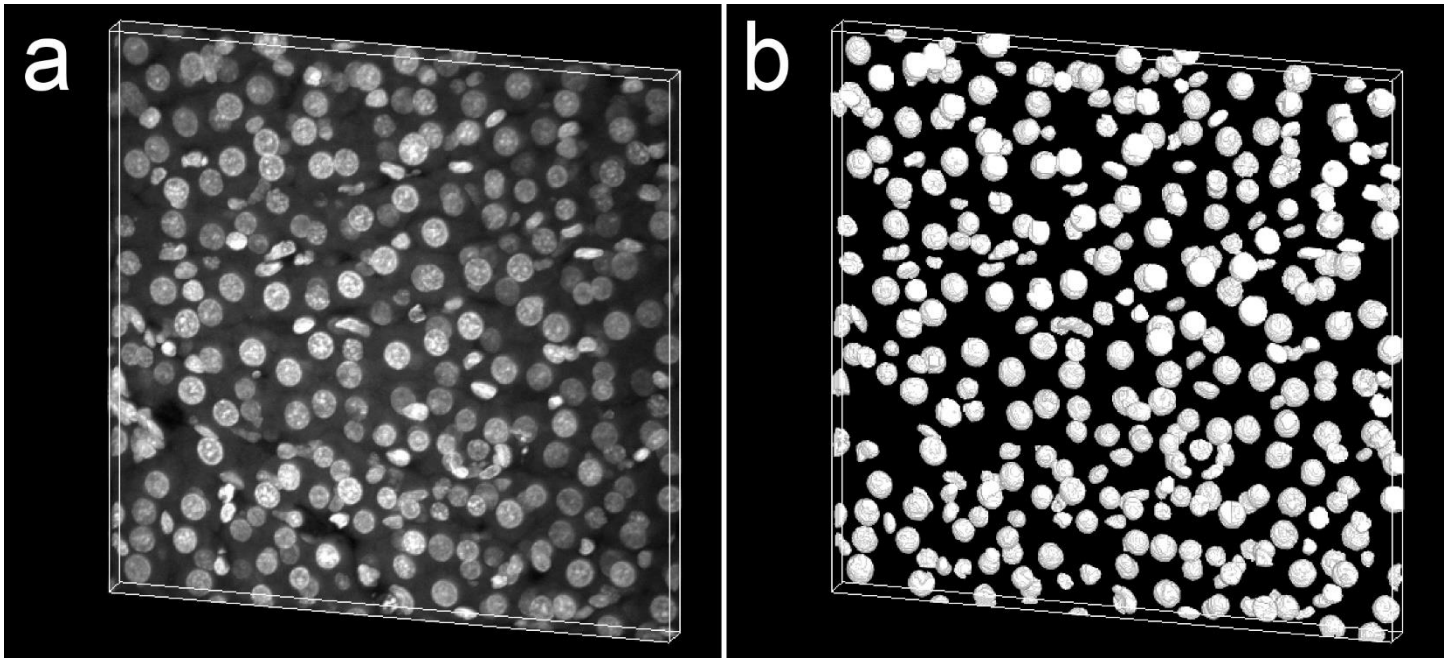

**Supplementary Figure 2** – Three-dimensional ground-truth nuclei data. A - Maximum projection volume rendering of a 3D volume of images of nuclei in a fixed section of a rat kidney. B – Alpha-blending projection of a volume rendering of the corresponding hand-outlined, ground-truth image volume. Image volume collected from a field that was 256 microns across.

## Legends to supplementary videos

**Video 1** – Volume rendering of the three-dimensional image of cleared kidney shown in Figure 1

**Video 2** – Figure 2: Comparison of DeepSynth with CellProfiler - Volume renderings of segmentation results obtained for a 130-162 micron deep section of the three-dimensional image of cleared kidney shown in Figure 3. Left to right – DeepSynth, original volume, CellProfiler, Cellprofiler after optimization

**Video 3** – Figure 2: Comparison of DeepSynth with FARSIGHT - Volume renderings of segmentation results obtained for a 130-162 micron deep section of the three-dimensional image of cleared kidney shown in Figure 3. Left to right – DeepSynth, original volume, FARSIGHT, FARSIGHT after optimization

**Video 4** – Figure 2: Comparison of DeepSynth with Squassh - Volume renderings of segmentation results obtained for a 130-162 micron deep section of the three-dimensional image of cleared kidney shown in Figure 3. Left to right – DeepSynth, original volume, Squassh, Squassh after optimization

**Video 5** – Volume rendering of the three-dimensional image of cleared kidney shown in Figure 3

**Video 6** – Figure 4: Comparison of DeepSynth with CellProfiler - Volume renderings of segmentation results obtained for a 31-50 micron deep section of the three-dimensional image of cleared kidney shown in Figure 3. Left to right – DeepSynth, original volume, CellProfiler, Cellprofiler after optimization

**Video 7** – Figure 4: Comparison of DeepSynth with FARSIGHT - Volume renderings of segmentation results obtained for a 31-50 micron deep section of the three-dimensional image of cleared kidney shown in Figure 3. Left to right – DeepSynth, original volume, FARSIGHT, FARSIGHT after optimization

**Video 8** – Figure 4: Comparison of DeepSynth with Squassh - Volume renderings of segmentation results obtained for a 31-50 micron deep section of the three-dimensional image of cleared kidney shown in Figure 3. Left to right – DeepSynth, original volume, Squassh, Squassh after optimization

**Video 9** – Volume rendering of the three-dimensional image of rat liver tissue shown in Figure 5

**Video 10** – Figure 6: Comparison of DeepSynth with CellProfiler - Volume renderings of segmentation results obtained for the three-dimensional image of rat liver tissue shown in Figure 5. Left to right – DeepSynth, original volume, CellProfiler, Cellprofiler after optimization

**Video 11** – Figure 6: Comparison of DeepSynth with FARSIGHT - Volume renderings of segmentation results obtained for the three-dimensional image of rat liver tissue shown in Figure 5. Left to right – DeepSynth, original volume, FARSIGHT, FARSIGHT after optimization

**Video 12** – Figure 6: Comparison of DeepSynth with Squassh - Volume renderings of segmentation results obtained for the three-dimensional image of rat liver tissue shown in Figure 5. Left to right – DeepSynth, original volume, Squassh, Squassh after optimization

**Video 13** – Figure 7: Comparison of DeepSynth with CellProfiler - Volume renderings of segmentation results obtained for the three-dimensional image of mouse intestine. Left to right – DeepSynth, original volume, CellProfiler, Cellprofiler after optimization

**Video 14** – Figure 7: Comparison of DeepSynth with FARSIGHT - Volume renderings of segmentation results obtained for the three-dimensional image of mouse intestine. Left to right – DeepSynth, original volume, FARSIGHT, FARSIGHT after optimization

**Video 15** – Figure 7: Comparison of DeepSynth with Squassh - Volume renderings of segmentation results obtained for three-dimensional image of mouse intestine. Left to right – DeepSynth, original volume, Squassh, Squassh after optimization
